# Supplementary material for: Spatially prioritizing mitigation for amphibian roadkills based on fatality estimation and landscape conversion
Source: Frontiers journal article supplement (doi:10.3389/fevo.2023.1123292), 2023-03-07
Supplement: Data_Sheet_1.docx [file Data_Sheet_1.docx]

# Supplementary Material 1

R and JAGS code.

###~~~~~~~~~~~~~~~~~~~~~~~~~~~~~~~~~~~~~~~~~~~~~~~~~~~~~~~~~~~~~~~~~

###** R code as supplemental material for Gonçalves et al. 2022

#

###** Amphibian roadkill estimation for EGR project

#

### Dail-Madsen open population model for unmarked individuals

### with a dependent double observer protocol

### to estimate road mortality at multiple sites

#

##* Author: Ismael V. Brack Aug/2022

###~~~~~~~~~~~~~~~~~~~~~~~~~~~~~~~~~~~~~~~~~~~~~~~~~~~~~~~~~~~~~~~~~

#* 50 sites (road stretches)

#* double dependent observers in (up to) 6 visits

#* Data are available at the repository: https://figshare.com/s/0cebdfcedb591dea6fed

library(jagsUI)

library(ggplot2)

devtools::source_url("https://github.com/ismaelvbrack/predictJAGS_func/blob/main/func_predictJAGS.R?raw=TRUE") # predictJAGS function

# Import data -------------------------------------------------------------

#* Count data

counts1 <- read.table("counts_camp1.txt",header=F)

#* Site covars

siteCovars <- read.table("siteCovs_2021.txt",header=T)

siteCovars$Trafego <- factor(siteCovars$Trafego, levels=c("baixo","medio","alto"))

#* Intervals covars

turnos1 <- read.table("turnos_camp1.txt",header=T)

rain1 <- read.table("pluv_camp1.txt",header=T)

intervals1 <- ifelse(turnos1[,2:(ncol(turnos1)-1)]=="tarde","night","day")

# Arranging data ----------------------------------------------------------

#* Arranging data

S <- nrow(counts1) # number of sites

J <- ncol(counts1)/2 # number of visits

#* Count data

Y1 <- array(as.matrix(counts1),dim=c(S,2,J),

dimnames=list(siteCovars$Trecho,c("obs1","obs2"),1:J))

# counts by both obs

ncap1 <- array(dim=c(S,J))

for (j in 1:J) {

for (i in 1:nrow(Y1[,,j])) {

ncap1[i,j] <- sum(Y1[i,,j])

}}

#* Gathering data

data1 <- list(Y=Y1,ncap=ncap1, # counts

night=ifelse(intervals1=="night",1,0),day=ifelse(intervals1=="day",1,0), # visits covs

rain=ifelse(rain1[,2:ncol(rain1)]=="chuva",1,0),

urban=siteCovars$urban,wetland=siteCovars$wetland,traffic=as.numeric(siteCovars$Trafego), # site covs

new.wet=new.wet, # data to predict entries for non-sampled sites

S=S,J=J) # sampling design

#* Define initial values

# Initial values session 1

inity1 <- ncap1+3

inity1[which(is.na(inity1), arr.ind=T)] <- inity1[which(is.na(inity1),arr.ind=T)[,1],2]

N1.1 <- inity1

N1.1[,2:J] <- NA

Pers.in1 <- Entrs.in1 <- array(,c(S,J))

for (i in 1:S){

for(j in 2:J){

Pers.in1[i,j] <- rbinom(1,inity1[i,j-1],.5) # keep ~half individuals

Entrs.in1[i,j] <- ifelse((inity1[i,j]-Pers.in1[i,j])>0, (inity1[i,j]-Pers.in1[i,j]), 0)

}}

inits1 <- function(){list(alpha.lam=rnorm(1),betaUrb.lam=rnorm(1),betaWet.lam=rnorm(1), # lambda

alpha.gam=rnorm(1),betaWet.gam=rnorm(1),betaRain.gam=rnorm(1), # gamma

alpha.phi=rnorm(3),betaDay.phi=rnorm(1), # phi

p0=runif(1,0,1), # p

Persists=Pers.in1,Entries=Entrs.in1,N=N1.1,z=rep(1,S))}

#* Parameters monitored

params <- c("alpha.lam","betaUrb.lam","betaWet.lam",

"alpha.gam","betaWet.gam","betaRain.gam",

"alpha.phi","betaDay.phi",

"p0",

#"Entries",

"siteFatals",#"new.siteFatals",

"AllFatals")#,"new.AllFatas")

# Writing JAGS model ------------------------------------------------------

sink("DM-depObs_fullCovs.txt")

cat("

model{

##* Priors -------------

# Initial abundance

alpha.lam ~ dnorm(0,0.1) # intercept for lambda

betaUrb.lam ~ dnorm(0,0.1) # effect of urban

betaWet.lam ~ dnorm(0,0.1) # effect of wetland

# Entries

alpha.gam ~ dnorm(0,0.1) # intercept for gamma

betaWet.gam ~ dnorm(0,0.1) # effect of wetland

betaRain.gam ~ dnorm(0,0.1) # effect of rain/no-rain (binary)

# Departures / Persistence

for(i in 1:3){

alpha.phi[i] ~ dnorm(0,0.1) # intercepts for phi

} # one for each traffic category (low, medium, high)

betaDay.phi ~ dnorm(0,0.1) # effect of day/night

# Detection

p0 ~ dunif(0,1)

##* Likelihood -------------

for (i in 1:S){ #each site

### State variable process

#* initial abundance j=1

N[i,1] ~ dpois(lambda[i])

log(lambda[i]) <- alpha.lam + betaUrb.lam*urban[i] + betaWet.lam*wetland[i]

# dynamics j>1

for(j in 2:J){

# Persistence

Persists[i,j] ~ dbin(phi[i,j],N[i,j-1])

logit(phi[i,j]) <- alpha.phi[traffic[i]] + betaDay.phi*day[i,j-1]

# Entries

Entries[i,j] ~ dpois(gamma[i,j])

log(gamma[i,j]) <- alpha.gam + betaWet.gam*wetland[i] + betaRain.gam*rain[i,j-1]

# Abundance

N[i,j] <- Persists[i,j] + Entries[i,j]

}#j

## Conditional multinomial cell probabilities

for(j in 1:J){

p[i,j] <- p0 # detection prob.

pi[i,1,j] <- p[i,j] # 1st observer

pi[i,2,j] <- (1-p[i,j]) * p[i,j] # 2nd observer

pi0[i,j] <- 1 - pi[i,1,j] - pi[i,2,j] # prob. of non-detection

pcap[i,j] <- 1 - pi0[i,j] # prob. of at least one observer to detect

pic[i,1,j] <- pi[i,1,j] / pcap[i,j] # conditional prob.1

pic[i,2,j] <- pi[i,2,j] / pcap[i,j] # conditional prob.2

## Observation process

ncap[i,j] ~ dbin(pcap[i,j] , N[i,j])

Y[i,1:2,j] ~ dmulti(pic[i,1:2,j] , ncap[i,j])

}#j

#* Derived -------------

# All entries/fatalities per site

siteFatals[i] <- sum(Entries[i,2:J])

}#i

# All fatalities in sampled sites

AllFatals <- sum(siteFatals[])

}",fill=TRUE)

sink()

# Running... --------------------------------------------------------------

#* MCMC settings

na <- 10000

ni <- 100000

nt <- 1

nb <- 20000

nc <- 3

# Run!

out1 <- jags(data1, inits1, params, "DM-depObs_fullCovs.txt",

n.chains=nc,n.thin=nt, n.iter=ni, n.burnin=nb, n.adapt=na, parallel=T)

# See results -------------------------------------------------------------

site.length <- 0.1 # in km

time.int <- 0.5 # in days

#* Parameter estimates

print(out1, digits=2)

#* Traceplots

traceplot(out1, param="AllFatals")

traceplot(out1, param="alpha.phi")

# Roadkills per day for each site

siteFatalsDay <- as.data.frame(t(apply(out1$sims.list$siteFatals / (time.int*(J-1)), 2,

function(x) c(mean(x),quantile(x,probs=c(0.025,0.5,0.975))))))

names(siteFatalsDay) <- c("mean","lower","median","upper")

siteFatalsDay <- cbind(Trecho=siteCovars$Trecho,siteFatalsDay)

siteFatalsDay <- cbind(siteFatalsDay,

t(apply(ncap1,1,function(x) c(c.mean=mean(x,na.rm=T),c.max=max(x,na.rm=T)))))

# Roadkills per km per day for all sites (average)

c(mean=mean(out1$sims.list$AllFatals / (time.int*(J-1)) / (S*site.length)),

quantile(out1$sims.list$AllFatals / (time.int*(J-1)) / (S*site.length),probs=c(0.025,0.5,0.975)))

# Relationship predictions ------------------------------------------------

# Initial abundance (lambda)

# ~ wetland

# wetland values to predict

new.wet <- cbind(urban=median(siteCovars$urban),

wetland=seq(min(siteCovars$wetland),max(siteCovars$wetland),,100)

)

pred.lamWet <- predictJAGS(fm=out1,params=c("alpha.lam","betaUrb.lam","betaWet.lam"),

newdata=new.wet,link="log",quants=c(0.025,0.5,0.975),appendData=T)

names(pred.lamWet)[2:4] <- c("lower","median","upper")

#* Figure! lambda ~ wetland

fig.lamWet <- ggplot(pred.lamWet, aes(x=wetland,y=median,ymax=upper,ymin=lower)) +

geom_line(size=1.4, color="darkgreen") + geom_ribbon(alpha=0.4, fill="darkgreen") +

theme_classic() + #coord_cartesian(ylim=c(0,100)) +

labs(x="% of wetlands (200m buffer)",y="Initial number of carcasses") +

scale_x_continuous(breaks=seq(.1,.9,0.2),labels=seq(10,90,20)) +

scale_y_continuous(limits=c(0,12),breaks=seq(0,12,2)) +

annotate("text",label="a",x=0,y=12,size=7) +

theme(axis.title=element_text(size=14),axis.text=element_text(size=12))

# Initial abundance (lambda)

# ~ urban

# urban values to predict

new.urb <- cbind(urban=seq(min(siteCovars$urban),max(siteCovars$urban),,100),

wetland=median(siteCovars$wetland))

# predict

pred.lamUrb <- predictJAGS(fm=out1,params=c("alpha.lam","betaUrb.lam","betaWet.lam"),

newdata=new.urb,link="log")

names(pred.lamUrb)[2:4] <- c("lower","median","upper")

#* Figure! lambda ~ urban

fig.lamUrb <- ggplot(pred.lamUrb, aes(x=urban,y=median,ymax=upper,ymin=lower)) +

geom_line(size=1.4, color="black") + geom_ribbon(alpha=0.4, fill="gray30") +

theme_classic() + #coord_cartesian(ylim=c(0,100)) +

labs(x="% of urban areas (200m buffer)",y="Initial number of carcasses") +

scale_x_continuous(breaks=seq(0,.3,0.1),labels=seq(0,30,10)) +

annotate("text",label="b",x=0,y=8,size=7) +

theme(axis.title=element_text(size=14),axis.text=element_text(size=12))

# Entries (gamma)

# ~ wetland + rain

# wetland values to predict

new.wet2 <- data.frame(wetland=rep(seq(min(siteCovars$wetland),max(siteCovars$wetland),,100),2),

rain=rep(c(0,1),each=100))

pred.gamWet <- predictJAGS(fm=out1,params=c("alpha.gam","betaWet.gam","betaRain.gam"),

newdata=new.wet2,link="log",quants=c(0.025,0.5,0.975),appendData=T)

names(pred.gamWet)[2:4] <- c("lower","median","upper")

pred.gamWet$rain <- factor(pred.gamWet$rain,labels=c("no-rain","rain"))

#* Figure! lambda ~ wetland

fig.gamWet <- ggplot(pred.gamWet, aes(x=wetland,y=median,ymax=upper,ymin=lower)) +

geom_line(aes(color=rain),size=1.4) + geom_ribbon(aes(fill=rain),alpha=0.4) +

theme_classic() + #ylim(0,16) +

scale_color_manual(values=c("tan4","blue4")) +

scale_fill_manual(values=c("tan3","blue")) +

labs(x="% of wetlands (200m buffer)",y="Entrant carcasses / 12h") +

scale_x_continuous(breaks=seq(.1,.9,0.2),labels=seq(10,90,20)) +

scale_y_continuous(limits=c(0,16),breaks=seq(0,16,4)) +

annotate("text",label="c",x=0,y=16,size=7) +

theme(axis.title=element_text(size=14),axis.text=element_text(size=12),

legend.title=element_blank(),legend.text=element_text(size=12),

legend.position="top")

# Persistence (phi)

# ~ traffic + day

pred.phi <- out1$summary[grep("alpha.phi",rownames(out1$summary)),

c("mean","2.5%","50%","97.5%")]

pred.phi <- as.data.frame(plogis(rbind(pred.phi,

pred.phi +

rep(out1$summary["betaDay.phi",c("mean","2.5%","50%","97.5%")],each=nrow(pred.phi)))))

pred.phi$traffic <- rep(c("baixo","medio","alto"),2)

pred.phi$turno <- rep(c("night","day"),each=3)

names(pred.phi)[2:4] <- c("lower","median","upper")

pred.phi$traffic <- factor(pred.phi$traffic, levels=c("baixo","medio","alto"), labels=c("low","medium","high"))

fig.phi <- ggplot(pred.phi, aes(x=traffic, y=mean,ymin=lower,ymax=upper,color=turno))+

geom_point(size=3,position=position_dodge(0.3)) +

geom_errorbar(width=0.3,size=1,position=position_dodge(0.3)) +

theme_classic() + scale_y_continuous(breaks=seq(0,1,0.2)) +

labs(x="Traffic",y="Carcass persistence prob.",color="") +

scale_color_manual(values=c("red3","blue3")) +

annotate("text",label="d",x=0.6,y=1,size=7) +

theme(axis.title=element_text(size=14),axis.text=element_text(size=12),

legend.text=element_text(size=12),legend.position="top")

# Supplementary Material 2

**Table S1.** Records of amphibian carcass with family and species or group identification. NI is not identified Anura carcass.

| **Family/***Species* | **Road** | | |
| --- | --- | --- | --- |
| **ERS-040** | **ERS-784** | **Total count** |
| **Bufonidae** | **63** | **41** | **104** |
| *Rhinella dorbignyi* | 13 | 30 | 43 |
| *Rhinella icterica* |  | 3 | 3 |
| *Rhinella* sp. | 50 | 8 | 58 |
| **Hylidae** | **1121** | **194** | **1315** |
| *Boana faber* |  | 1 | 1 |
| *Boana pulchella* | 99 | 48 | 147 |
| *Boana* sp. | 3 |  | 3 |
| *Dendropsophus* gr. *microcephalus* | 148 | 6 | 154 |
| *Dendropsophus minutus* | 3 |  | 3 |
| *Dendropsophus* sp. | 459 | 21 | 480 |
| Hylidae | 147 | 26 | 173 |
| *Pseudis minuta* | 136 | 39 | 175 |
| *Scinax* gr. *catharinae* | 8 | 1 | 9 |
| *Scinax* gr. *ruber* | 10 | 4 | 14 |
| *Scinax granulatus* | 3 |  | 3 |
| *Scinax nasicus* | 1 |  | 1 |
| *Scinax* sp. | 38 | 23 | 61 |
| *Scinax squalirostris* | 64 | 24 | 88 |
| *Scinax tymbamirim* | 1 | 1 | 2 |
| *Trachycephalus mesophaeus* | 1 |  | 1 |
| **Leptodactylidae** | **1013** | **172** | **1185** |
| Leptodactylidae | 156 | 4 | 160 |
| *Leptodactylus gracilis* | 72 | 19 | 91 |
| *Leptodactylus latinasus* | 4 | 1 | 5 |
| *Leptodactylus luctator* | 294 | 41 | 335 |
| *Leptodactylus* sp. | 212 | 16 | 228 |
| *Physalaemus biligonigerus* | 59 | 18 | 77 |
| *Physalaemus cuvieri* | 2 | 3 | 5 |
| *Physalaemus gracilis* | 30 | 40 | 70 |
| *Physalaemus henselii* | 5 |  | 5 |
| *Physalaemus lisei* | 2 |  | 2 |
| *Physalaemus* sp. | 97 | 30 | 127 |
| *Pseudopaludicola falcipes* | 80 |  | 80 |
| **Microhylidae** | **8** |  | **8** |
| *Elachistocleis bicolor* | 8 |  | 8 |
| **Odontophrynidae** | **7** | **13** | **20** |
| *Odontophrynus* sp. | 7 | 13 | 20 |
| **Anura NI** | **596** | **106** | **702** |
| **Total count** | **2808** | **526** | **3334** |

# Supplementary Material 3

**Table S2.** Data used to segment prioritization to receive mitigation actions (in red are the segments indicated as priority). Estimated fatality rate with credibility intervals for each segment and landscape transition rate.

| **ID** | **Estimated Fatality Rate (individuals/segment*day)** | **Lower Credibility Intervals** | **Upper Credibility Intervals** | **Landscape Transition Rate** **(%)** | **Priority segment** |
| --- | --- | --- | --- | --- | --- |
| 6 | 52.7 | 48.4 | 57.6 | 2.32 | Yes |
| 5 | 43.47 | 39.6 | 47.6 | 2.06 | Yes |
| 4 | 35.99 | 32.4 | 39.6 | 1.15 | Yes |
| 49 | 19.98 | 16.8 | 23.2 | 3.68 | Yes |
| 48 | 14.94 | 12 | 18 | 3.13 | Yes |
| 3 | 14.55 | 12 | 17.2 | 0.00 | Yes |
| 1 | 12.88 | 10.4 | 15.6 | 0.00 | Yes |
| 47 | 10.56 | 8.4 | 12.8 | 0.97 | Yes |
| 2 | 10.47 | 8.4 | 12.4 | 0.00 | Yes |
| 42 | 10.05 | 8 | 12.4 | 1.61 | Yes |
| 7 | 27.2 | 24 | 30.4 | 29.41 | No |
| 13 | 26.19 | 22.4 | 30 | 98.33 | No |
| 15 | 23.68 | 20 | 27.6 | 94.69 | No |
| 10 | 23.45 | 19.6 | 27.2 | 51.47 | No |
| 31 | 22.68 | 21.2 | 24.4 | 35.34 | No |
| 9 | 22.46 | 19.2 | 26 | 43.56 | No |
| 11 | 22.12 | 18.4 | 26 | 73.81 | No |
| 14 | 21.27 | 17.6 | 25.2 | 97.86 | No |
| 8 | 19.84 | 17.2 | 22.8 | 40.00 | No |
| 30 | 19.49 | 18 | 21.2 | 11.06 | No |
| 23 | 18.37 | 16.8 | 20 | 10.00 | No |
| 12 | 18.31 | 15.2 | 21.6 | 93.33 | No |
| 32 | 18.26 | 16.8 | 20 | 32.28 | No |
| 16 | 13.98 | 11.2 | 16.8 | 90.81 | No |
| 17 | 12.38 | 11.2 | 14 | 6.34 | No |
| 50 | 9.92 | 8 | 12 | 4.60 | No |
| 21 | 9.91 | 8.4 | 11.6 | 7.69 | No |
| 33 | 9.62 | 8.4 | 11.2 | 9.24 | No |
| 45 | 9.48 | 7.2 | 11.6 | 0.00 | No |
| 40 | 9.46 | 7.6 | 11.6 | 3.16 | No |
| 34 | 8.81 | 7.6 | 10.4 | 3.45 | No |
| 22 | 8.7 | 7.2 | 10.4 | 8.82 | No |
| 46 | 8.49 | 6.8 | 10.4 | 0.00 | No |
| 35 | 8.41 | 7.2 | 10 | 0.00 | No |
| 38 | 7.35 | 5.6 | 9.2 | 3.94 | No |
| 36 | 7.09 | 5.6 | 8.8 | 1.65 | No |
| 44 | 6.75 | 4.8 | 8.8 | 0.00 | No |
| 39 | 6.32 | 4.8 | 8 | 3.94 | No |
| 41 | 5.51 | 4 | 7.2 | 1.61 | No |
| 26 | 4.36 | 3.2 | 6 | 6.93 | No |
| 43 | 4.06 | 2.8 | 5.6 | 0.72 | No |
| 37 | 3.76 | 2.4 | 5.2 | 3.94 | No |
| 18 | 3.69 | 2.4 | 5.2 | 2.84 | No |
| 24 | 2.36 | 1.2 | 4 | 9.52 | No |
| 29 | 2.31 | 0.8 | 4 | 5.59 | No |
| 20 | 2.18 | 0.8 | 4 | 8.29 | No |
| 19 | 2.15 | 0.8 | 3.6 | 5.26 | No |
| 25 | 1.97 | 0.8 | 3.6 | 8.17 | No |
| 28 | 1.95 | 0.8 | 3.6 | 6.31 | No |
| 27 | 1.56 | 0.4 | 3.2 | 7.66 | No |
